# Supplementary material for: Efficient One-Step Synthesis of a Pt-Free Zn0.76Co0.24S Counter Electrode for Dye-Sensitized Solar Cells and Its Versatile Application in Photoelectrochromic Devices
Source: MDPI journal article supplement (doi:10.3390/nano13202812), 2023-10-23
Supplement: s1 [file s1]

# Efficient One-Step Synthesis of a Pt-Free $\text{Zn}_{0.76}\text{Co}_{0.24}\text{S}$ Counter Electrode for Dye-Sensitized Solar Cells and Its Versatile Application in Photoelectrochromic Devices

Yerbolat Tashenov <sup>1,2</sup>, Diana Suleimenova <sup>1,2</sup>, Bakhytzhhan Baptayev <sup>1</sup>, Salimgerey Adilov <sup>1,3,\*</sup> and Mannix P. Balanay <sup>1,3,\*</sup>

<sup>1</sup> National Laboratory Astana, Nazarbayev University, 53 Kabanbay Batyr Ave., Astana 010000, Kazakhstan; tashenovyerbolat@gmail.com (Y.T.); www.lady.di@mail.ru (D.S.)

<sup>2</sup> Department of Chemistry, L.N. Gumilyov Eurasian National University, 2 Satpayev St., Astana 010008, Kazakhstan

<sup>3</sup> Department of Chemistry, Nazarbayev University, 53 Kabanbay Batyr Ave., Astana 010000, Kazakhstan

\* Correspondence: sadilov@nu.edu.kz (S.A.); mannix.balanay@nu.edu.kz (M.P.B.); Tel.: +7-717-270-6368 (S.A.); +7-717-269-4657 (M.P.B.)

## Supplementary Information

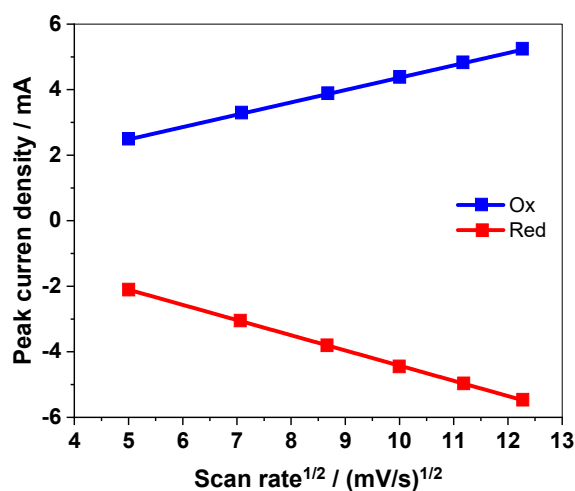

Figure S1. Correlation between Peak Current Density and Scan Rate for  $\text{Zn}_{0.76}\text{Co}_{0.24}\text{S}$ .

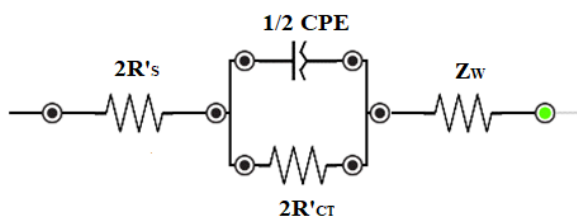

Figure S2. Equivalent electrical circuit used for fitting Nyquist plots of symmetrical dummy cells.

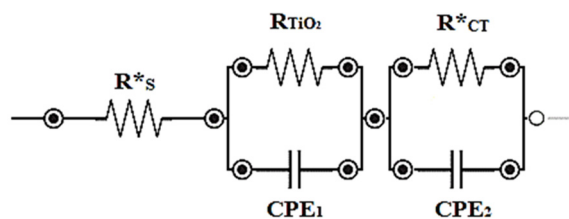

**Figure S3.** Equivalent electrical circuit used for fitting Nyquist plots of DSSCs.

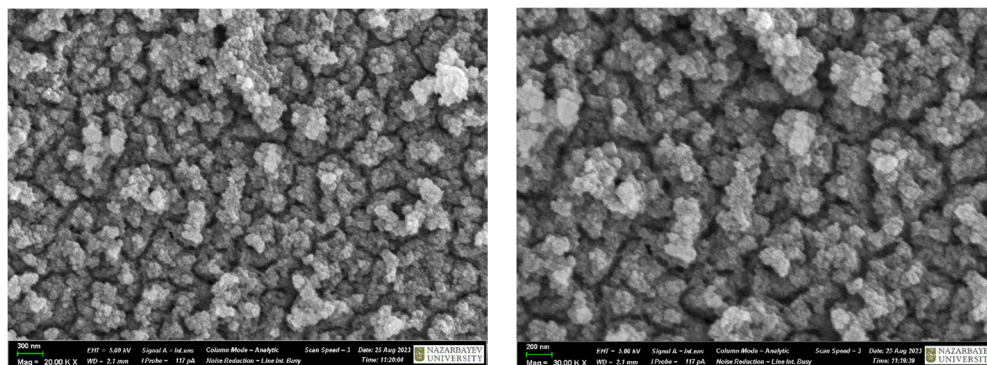

**Figure S4.** Scanning electron microscopy images of PB film deposited on FTO glass at different resolutions.
